# Supplementary material
Source: PubMed Central journal article supplement (PMC6866576)
Supplement: HBM-39-822-s001.pdf [file HBM-39-822-s001.pdf]

**SUPPLEMENTAL MATERIAL**

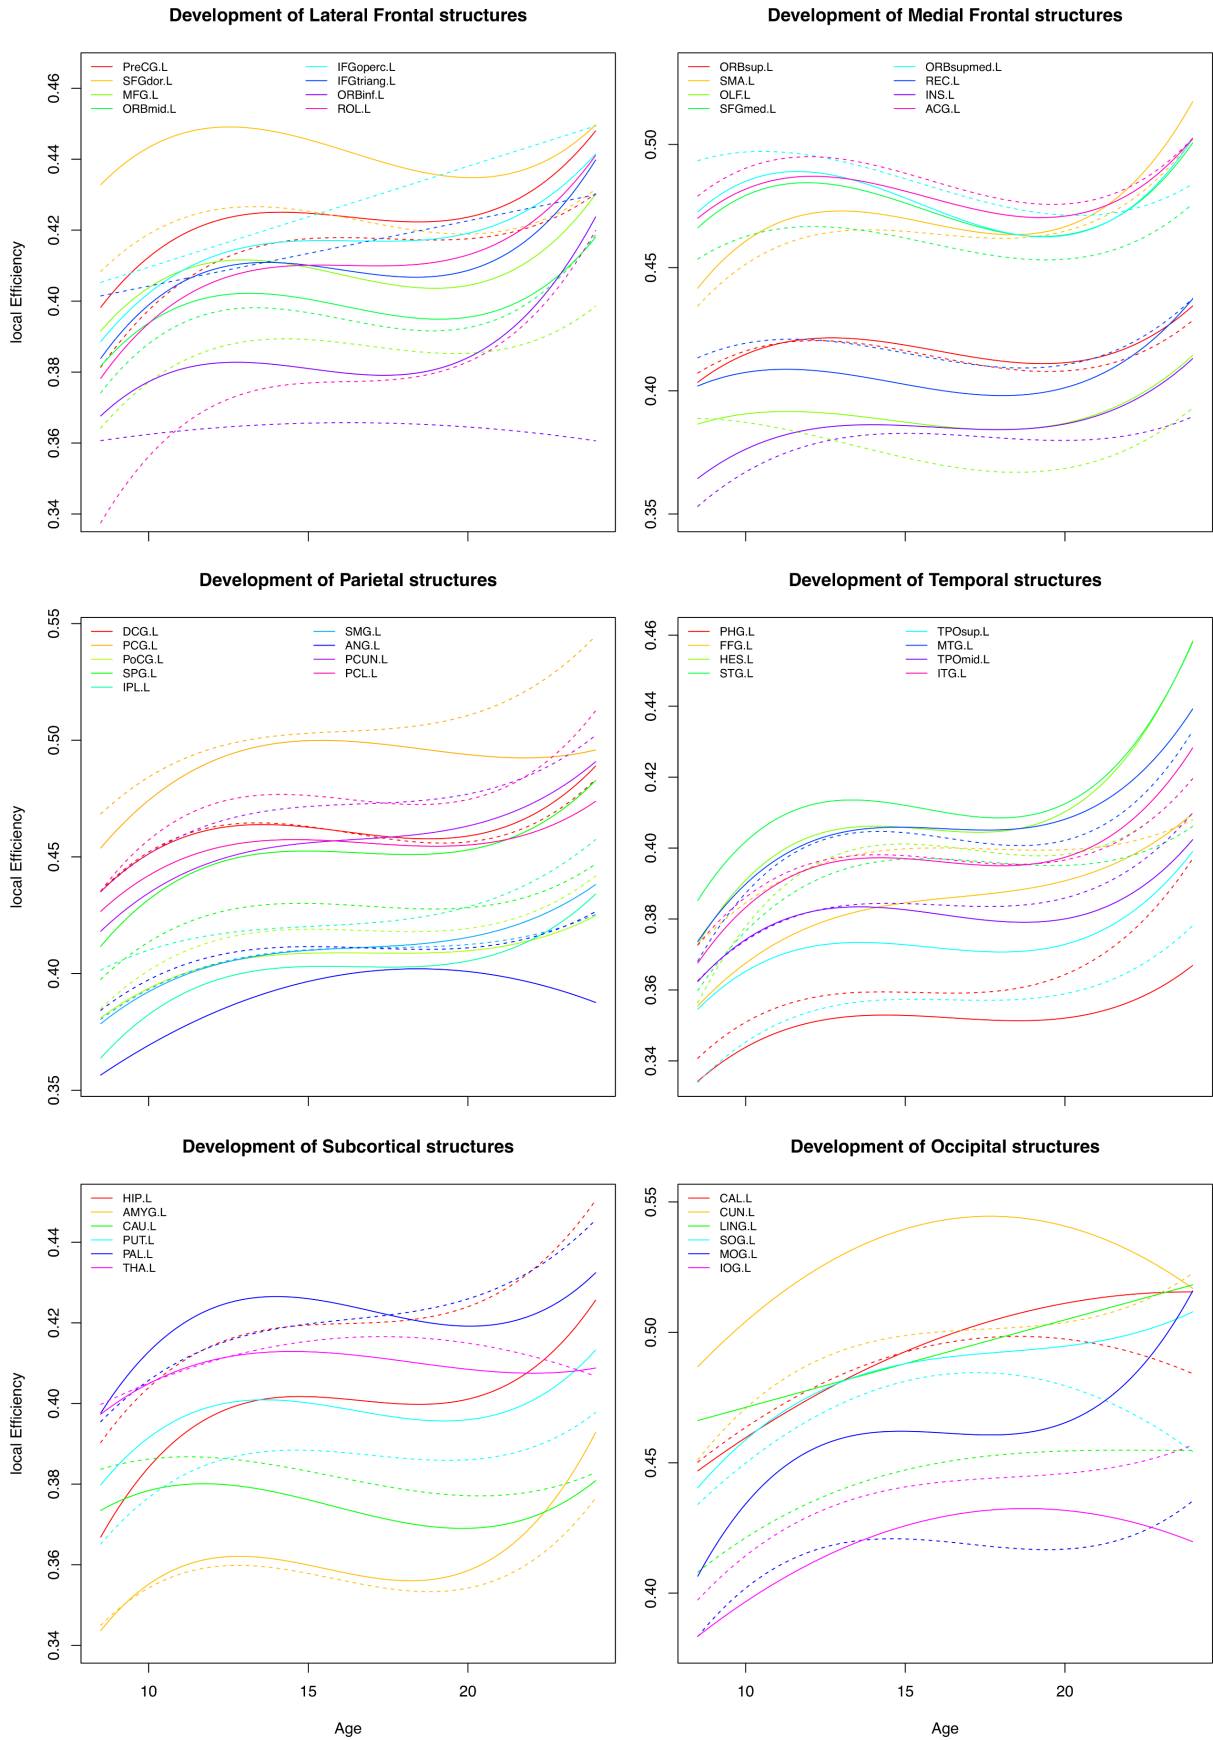

**Supplemental Figure S1** – Development of FA-weighted local efficiency during adolescence. All 90 AAL regions are grouped in 6 large cortical and subcortical brain regions. Left and right hemispheres have the same color; dashed lines represent trajectory of local efficiency of regions in the right hemisphere, continuous lines represent left hemispheric regions.

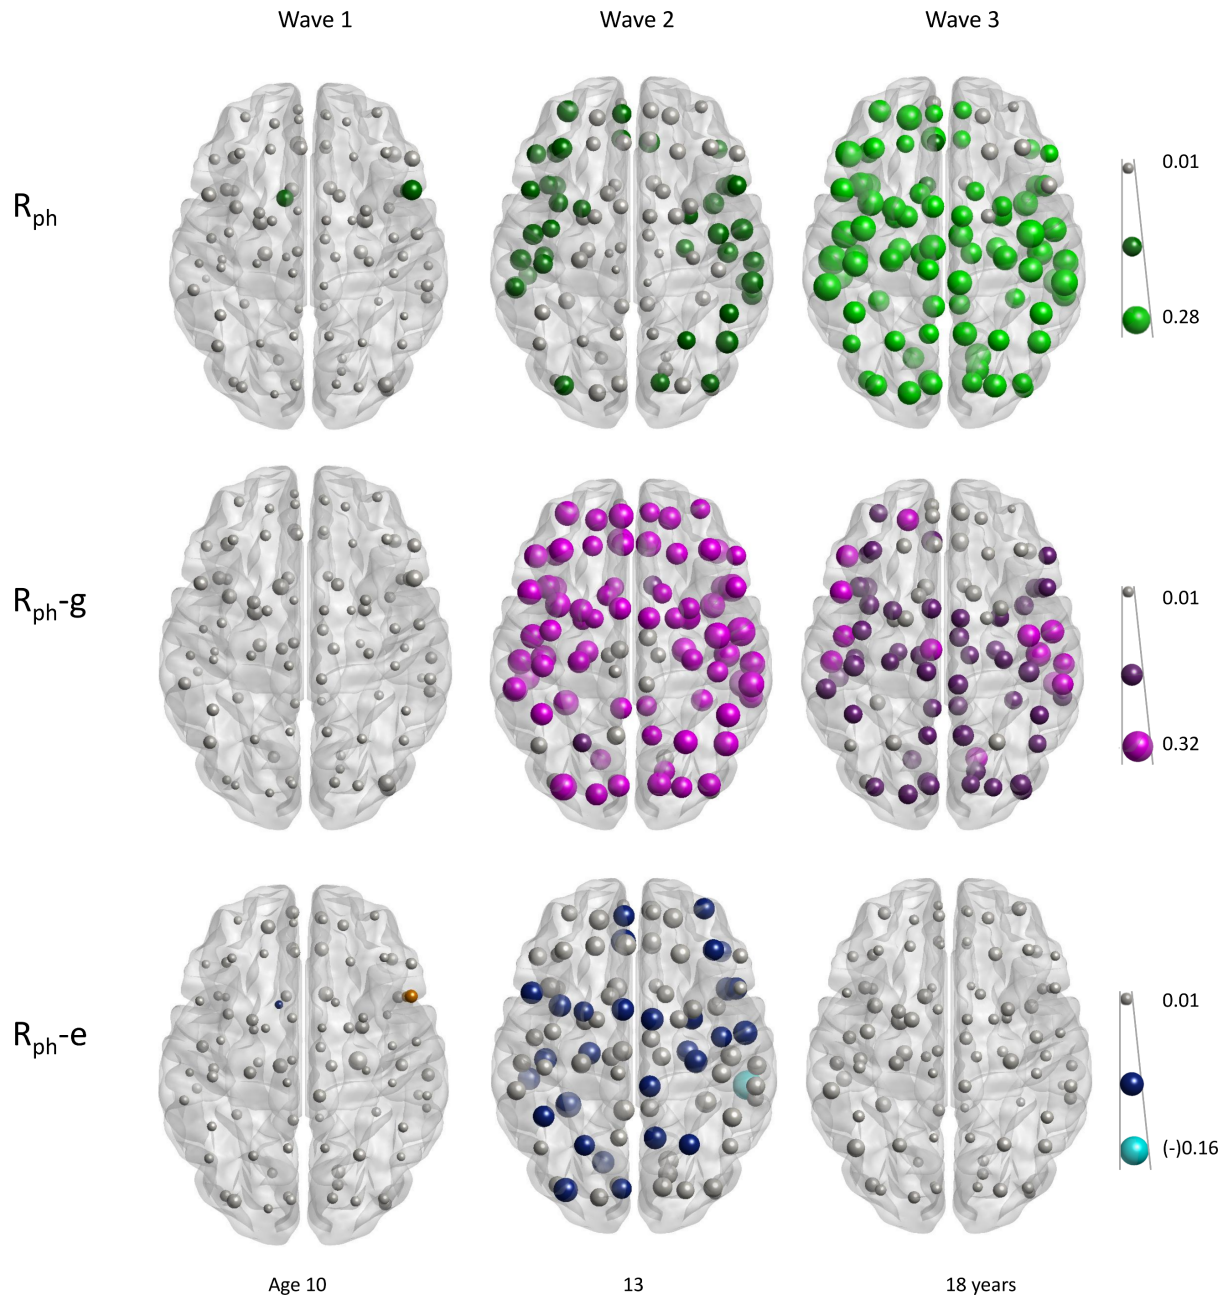

**Supplemental Figure S2** – Presentation of the phenotypic (top, green), genetic (middle, pink), and unique environmental (bottom, blue) correlations between local efficiency and IQ at wave 1, 2, and 3. Dark colors indicate significance at  $p < 0.05$ ; light colors indicate FDR-corrected significance. Size of the sphere is the absolute correlation strength; for the  $r_{ph-e}$ , the correlations are negative at wave 2, mainly positive at wave 3 (one region reached significance at  $p < 0.05$ ; indicated in orange). Although there was a high genetic contribution to the correlation between IQ and local efficiency at age 13 (wave 2), the negative unique environmental influences led to a small phenotypic correlation. At age 18 (wave 3), the negative unique environmental correlation was not present, and the phenotypic correlation comes to bloom.

**Supplemental Table SI** – Phenotypic correlations between mean IQ and local efficiency at all three measurements (M1, M2, M3).

|                    | Left   |               |               | Right       |               |               |
|--------------------|--------|---------------|---------------|-------------|---------------|---------------|
|                    | Rph M1 | Rph M2        | Rph M3        | Rph M1      | Rph M2        | Rph M3        |
| Precentral         | 0.02   | <u>0.15**</u> | <b>0.24*</b>  | 0.03        | <u>0.18**</u> | <b>0.27**</b> |
| Frontal_Sup        | 0.04   | <u>0.11**</u> | <b>0.15</b>   | 0.01        | <u>0.13**</u> | 0.14          |
| Frontal_Sup_Orb    | 0.03   | <u>0.13**</u> | <b>0.24**</b> | 0.01        | <u>0.14**</u> | 0.12          |
| Frontal_Mid        | 0.04   | <u>0.18**</u> | <b>0.19*</b>  | -0.04       | <u>0.13**</u> | 0.14          |
| Frontal_Mid_Orb    | 0.03   | <u>0.19**</u> | <b>0.20*</b>  | -0.04       | <u>0.09**</u> | 0.06          |
| Frontal_Inf_Oper   | 0.09   | <u>0.16**</u> | <b>0.22**</b> | <u>0.16</u> | <u>0.16**</u> | 0.13*         |
| Frontal_Inf_Tri    | 0.04   | <u>0.16**</u> | <b>0.25**</b> | 0.11        | <u>0.13**</u> | <b>0.15*</b>  |
| Frontal_Inf_Orb    | 0.07   | <u>0.17**</u> | <b>0.18*</b>  | 0.11        | <u>0.16**</u> | <b>0.17</b>   |
| Rolandic_Oper      | 0.03   | <u>0.18**</u> | <b>0.26**</b> | 0.06        | <u>0.20**</u> | <b>0.23**</b> |
| Supp_Motor_Area    | 0.01   | <u>0.12**</u> | <b>0.20*</b>  | 0.02        | <u>0.11**</u> | <b>0.19*</b>  |
| Olfactory          | 0.09   | <u>0.09**</u> | <u>0.14</u>   | 0.08        | <u>0.13*</u>  | 0.11          |
| Frontal_Sup_Medial | 0.01   | <u>0.16**</u> | <b>0.15</b>   | -0.00       | <u>0.13**</u> | <b>0.14</b>   |
| Frontal_Med_Orb    | 0.03   | 0.07          | 0.12          | 0.03        | 0.06          | 0.12          |
| Rectus             | 0.12   | <u>0.16**</u> | <b>0.23*</b>  | 0.06        | <u>0.18**</u> | 0.10          |
| Insula             | 0.08   | <u>0.16**</u> | <b>0.24*</b>  | 0.04        | <u>0.19**</u> | <b>0.23*</b>  |
| Cingulum_Ant       | 0.09   | <u>0.13**</u> | <u>0.14</u>   | 0.02        | <u>0.12**</u> | <b>0.15</b>   |
| Cingulum_Mid       | 0.03   | 0.07          | <b>0.25**</b> | 0.03        | 0.09          | <b>0.22*</b>  |
| Cingulum_Post      | -0.00  | <u>0.11**</u> | <b>0.20*</b>  | 0.00        | <u>0.12**</u> | <b>0.18*</b>  |
| Hippocampus        | -0.01  | <u>0.13**</u> | <b>0.22*</b>  | -0.03       | <u>0.10**</u> | <b>0.23*</b>  |
| ParaHippocampal    | 0.09   | <u>0.12**</u> | <b>0.22*</b>  | 0.08        | <u>0.15**</u> | <b>0.2*</b>   |
| Amygdala           | 0.11   | <u>0.11**</u> | <b>0.18</b>   | 0.12        | <u>0.15**</u> | <b>0.19*</b>  |
| Calcarine          | -0.00  | 0.06          | <b>0.20*</b>  | 0.01        | <u>0.12**</u> | <b>0.21*</b>  |
| Cuneus             | 0.03   | <u>0.13**</u> | <b>0.19*</b>  | -0.02       | <u>0.16**</u> | <b>0.18*</b>  |
| Lingual            | 0.04   | <u>0.09**</u> | <b>0.19*</b>  | 0.02        | 0.06          | <b>0.24**</b> |
| Occipital_Sup      | 0.00   | <u>0.14**</u> | <b>0.21*</b>  | -0.03       | <u>0.13**</u> | <b>0.21*</b>  |
| Occipital_Mid      | -0.05  | <u>0.17**</u> | <b>0.19*</b>  | -0.10       | <u>0.15**</u> | <b>0.17*</b>  |
| Occipital_Inf      | -0.03  | 0.08          | <b>0.16</b>   | -0.08       | 0.12          | <b>0.16*</b>  |
| Fusiform           | 0.02   | <u>0.13**</u> | <b>0.19</b>   | -0.01       | <u>0.12**</u> | <b>0.17*</b>  |
| Postcentral        | 0.02   | <u>0.17**</u> | <b>0.24*</b>  | 0.02        | <u>0.12**</u> | <b>0.22*</b>  |
| Parietal_Sup       | 0.00   | <u>0.07*</u>  | <b>0.18</b>   | -0.01       | <u>0.15**</u> | <b>0.19</b>   |
| Parietal_Inf       | -0.05  | <u>0.12**</u> | <b>0.20*</b>  | -0.00       | <u>0.16**</u> | <b>0.2*</b>   |
| SupraMarginal      | -0.06  | <u>0.15**</u> | <b>0.26*</b>  | 0.06        | <u>0.20**</u> | <b>0.25**</b> |
| Angular            | -0.06  | 0.10          | <b>0.15</b>   | -0.03       | <u>0.20**</u> | <b>0.21*</b>  |
| Precuneus          | 0.01   | 0.10          | <b>0.17*</b>  | 0.02        | <u>0.08**</u> | <b>0.22*</b>  |
| Paracentral_Lobule | -0.02  | 0.04          | <b>0.19*</b>  | 0.01        | 0.03          | <b>0.23*</b>  |
| Caudate            | 0.12   | <u>0.12**</u> | <b>0.18</b>   | 0.07        | <u>0.12**</u> | <b>0.16</b>   |
| Putamen            | 0.05   | <u>0.15**</u> | <b>0.22*</b>  | 0.05        | <u>0.13**</u> | <b>0.17</b>   |
| Pallidum           | 0.03   | <u>0.11**</u> | <b>0.19</b>   | -0.01       | <u>0.13**</u> | 0.11          |
| Thalamus           | 0.00   | 0.04          | <b>0.19*</b>  | 0.03        | 0.04          | <b>0.19*</b>  |
| Heschl             | 0.02   | <u>0.16**</u> | <b>0.21*</b>  | -0.04       | <u>0.18**</u> | <b>0.24**</b> |
| Temporal_Sup       | -0.01  | <u>0.19**</u> | <b>0.28**</b> | -0.02       | <u>0.19**</u> | <b>0.24**</b> |
| Temporal_Pole_Sup  | 0.07   | <u>0.16**</u> | <b>0.23*</b>  | <u>0.11</u> | <u>0.20**</u> | <b>0.19*</b>  |
| Temporal_Mid       | -0.03  | <u>0.20**</u> | <b>0.24*</b>  | -0.05       | <u>0.18**</u> | <b>0.22*</b>  |
| Temporal_Pole_Mid  | 0.05   | <u>0.17**</u> | <b>0.24*</b>  | 0.07        | <u>0.14**</u> | <b>0.19*</b>  |
| Temporal_Inf       | 0.00   | <u>0.16**</u> | <b>0.25*</b>  | 0.02        | <u>0.14**</u> | <b>0.24**</b> |

Underlined: significant correlations ( $p < 0.05$ ) between local efficiency and mean IQ

Bold: FDR corrected significant correlations between local efficiency and mean IQ

\* significant  $r_{ph-g}$  ( $p < 0.05$ )\*\* FDR corrected significant  $r_{ph-g}$

**Supplemental Table SII** – Heritabilities of local efficiency at all three measurements (M1, M2, M3); and the genetic correlation between local efficiency of measurements 1 and 2 (M1-2), and measurements 2 and 3 (M2-3).

|                    | Left               |                   |      |             |             | Right              |                   |      |             |             |
|--------------------|--------------------|-------------------|------|-------------|-------------|--------------------|-------------------|------|-------------|-------------|
|                    | Broad heritability |                   |      | Rg          |             | Broad heritability |                   |      | Rg          |             |
|                    | M1                 | M2                | M3   | M1-2        | M2-3        | M1                 | M2                | M3   | M1-2        | M2-3        |
| Precentral         | 0.43               | 0.21              | 0.44 | <b>0.72</b> | <b>0.88</b> | 0.34               | 0.26              | 0.47 | <b>0.83</b> | <u>0.70</u> |
| Frontal_Sup        | 0.30               | 0.25              | 0.52 | <b>0.87</b> | <u>0.68</u> | 0.30               | 0.20              | 0.46 | <u>0.76</u> | <u>0.79</u> |
| Frontal_Sup_Orb    | 0.24               | 0.19              | 0.45 | 0.64        | 0.50        | 0.16               | 0.17              | 0.43 | 0.35        | 0.47        |
| Frontal_Mid        | 0.40               | 0.19              | 0.40 | <u>0.70</u> | 0.54        | 0.31               | 0.17              | 0.38 | 0.60        | <u>0.77</u> |
| Frontal_Mid_Orb    | 0.29               | 0.21              | 0.38 | 0.67        | <u>0.75</u> | 0.18               | 0.16 <sup>a</sup> | 0.20 | 0.63        | <u>0.94</u> |
| Frontal_Inf_Oper   | 0.55               | 0.22              | 0.40 | <u>0.61</u> | <u>0.66</u> | 0.32               | 0.15              | 0.33 | 0.60        | 0.49        |
| Frontal_Inf_Tri    | 0.22               | 0.11 <sup>a</sup> | 0.34 | 0.49        | 0.52        | 0.25               | 0.14 <sup>a</sup> | 0.21 | 0.53        | 0.49        |
| Frontal_Inf_Orb    | 0.13 <sup>a</sup>  | 0.09 <sup>a</sup> | 0.24 | 0.10        | 0.40        | 0.13               | 0.12 <sup>a</sup> | 0.23 | 0.21        | 0.30        |
| Rolandic_Oper      | 0.54               | 0.26              | 0.42 | <b>0.65</b> | <u>0.79</u> | 0.33               | 0.23              | 0.52 | 0.61        | <u>0.66</u> |
| Supp_Motor_Area    | 0.42               | 0.21              | 0.44 | <b>0.77</b> | <u>0.85</u> | 0.35               | 0.29              | 0.47 | <b>0.83</b> | <u>0.64</u> |
| Olfactory          | 0.24               | 0.10 <sup>a</sup> | 0.30 | 0.47        | 0.31        | 0.23               | 0.19 <sup>a</sup> | 0.37 | 0.08        | 0.10        |
| Frontal_Sup_Medial | 0.26               | 0.27              | 0.53 | <u>0.63</u> | <u>0.65</u> | 0.23               | 0.16              | 0.49 | 0.53        | <u>0.67</u> |
| Frontal_Med_Orb    | 0.15               | 0.16              | 0.36 | 0.69        | 0.65        | 0.17               | 0.06 <sup>a</sup> | 0.45 | 0.25        | 0.34        |
| Rectus             | 0.24               | 0.20              | 0.39 | 0.61        | 0.60        | 0.12 <sup>a</sup>  | 0.12 <sup>a</sup> | 0.24 | -0.12       | -0.05       |
| Insula             | 0.32               | 0.19              | 0.36 | 0.57        | 0.54        | 0.31               | 0.24              | 0.45 | <b>0.75</b> | 0.56        |
| Cingulum_Ant       | 0.20               | 0.17              | 0.43 | 0.47        | 0.25        | 0.19               | 0.21              | 0.49 | 0.60        | 0.46        |
| Cingulum_Mid       | 0.36               | 0.26              | 0.42 | <b>0.87</b> | 0.49        | 0.41               | 0.28              | 0.46 | <b>0.90</b> | <u>0.60</u> |
| Cingulum_Post      | 0.28               | 0.25              | 0.46 | <b>0.83</b> | 0.49        | 0.38               | 0.42              | 0.54 | <b>0.83</b> | <u>0.51</u> |
| Hippocampus        | 0.32               | 0.28              | 0.37 | <u>0.76</u> | 0.50        | 0.39               | 0.30              | 0.59 | 0.52        | <u>0.59</u> |
| ParaHippocampal    | 0.30               | 0.17              | 0.22 | 0.14        | 0.40        | 0.12               | 0.18 <sup>a</sup> | 0.46 | 0.54        | 0.62        |
| Amygdala           | 0.35               | 0.09 <sup>a</sup> | 0.20 | 0.24        | 0.47        | 0.14               | 0.29              | 0.48 | 0.58        | 0.37        |
| Calcarine          | 0.39               | 0.37              | 0.37 | <b>0.84</b> | 0.49        | 0.43               | 0.31              | 0.41 | <b>0.74</b> | <u>0.65</u> |
| Cuneus             | 0.37               | 0.40              | 0.38 | <b>0.86</b> | <u>0.7</u>  | 0.43               | 0.25              | 0.37 | <b>0.78</b> | 0.56        |
| Lingual            | 0.29               | 0.28              | 0.42 | <b>0.86</b> | <u>0.65</u> | 0.34               | 0.34              | 0.46 | <b>0.86</b> | <u>0.68</u> |
| Occipital_Sup      | 0.42               | 0.40              | 0.33 | <b>0.77</b> | <u>0.65</u> | 0.30               | 0.34              | 0.33 | <b>0.93</b> | <u>0.67</u> |
| Occipital_Mid      | 0.30               | 0.38              | 0.44 | <u>0.60</u> | <u>0.61</u> | 0.44               | 0.29              | 0.63 | 0.49        | <u>0.78</u> |
| Occipital_Inf      | 0.18               | 0.26              | 0.29 | 0.52        | 0.60        | 0.31               | 0.13 <sup>a</sup> | 0.26 | 0.50        | 0.62        |
| Fusiform           | 0.33               | 0.15              | 0.29 | 0.42        | 0.58        | 0.35               | 0.15              | 0.56 | 0.67        | 0.60        |
| Postcentral        | 0.34               | 0.21              | 0.37 | <b>0.78</b> | <u>0.71</u> | 0.39               | 0.23              | 0.57 | <b>0.83</b> | <u>0.66</u> |
| Parietal_Sup       | 0.27               | 0.32              | 0.49 | <b>0.71</b> | 0.41        | 0.40               | 0.22              | 0.59 | <b>0.79</b> | <u>0.55</u> |
| Parietal_Inf       | 0.43               | 0.17              | 0.47 | 0.65        | 0.59        | 0.41               | 0.33              | 0.59 | <b>0.85</b> | <u>0.65</u> |
| SupraMarginal      | 0.43               | 0.22              | 0.43 | <b>0.60</b> | <u>0.58</u> | 0.43               | 0.29              | 0.68 | <b>0.85</b> | <b>0.79</b> |
| Angular            | 0.37               | 0.31              | 0.50 | <b>0.78</b> | <u>0.50</u> | 0.41               | 0.34              | 0.66 | <b>0.77</b> | <b>0.62</b> |
| Precuneus          | 0.36               | 0.33              | 0.37 | <b>0.79</b> | <u>0.61</u> | 0.40               | 0.27              | 0.56 | <b>0.87</b> | <u>0.66</u> |
| Paracentral_Lobule | 0.44               | 0.28              | 0.37 | <b>0.95</b> | <b>0.88</b> | 0.51               | 0.37              | 0.50 | <b>0.95</b> | <u>0.76</u> |
| Caudate            | 0.34               | 0.11 <sup>a</sup> | 0.27 | 0.23        | 0.51        | 0.36               | 0.15              | 0.45 | 0.71        | <u>0.90</u> |
| Putamen            | 0.40               | 0.14              | 0.39 | 0.66        | 0.74        | 0.36               | 0.22              | 0.48 | <b>0.89</b> | <u>0.76</u> |
| Pallidum           | 0.40               | 0.21              | 0.39 | <b>0.85</b> | <u>0.81</u> | 0.33               | 0.30              | 0.53 | <b>0.81</b> | <u>0.69</u> |
| Thalamus           | 0.38               | 0.20              | 0.29 | <b>0.91</b> | 0.67        | 0.40               | 0.25              | 0.36 | <b>0.94</b> | 0.62        |
| Heschl             | 0.38               | 0.15              | 0.35 | 0.43        | 0.59        | 0.39               | 0.28              | 0.51 | 0.42        | 0.53        |
| Temporal_Sup       | 0.51               | 0.20              | 0.46 | <u>0.64</u> | 0.58        | 0.44               | 0.27              | 0.61 | <b>0.70</b> | <u>0.69</u> |
| Temporal_Pole_Sup  | 0.31               | 0.14              | 0.32 | 0.43        | 0.55        | 0.16               | 0.20              | 0.37 | 0.39        | 0.59        |
| Temporal_Mid       | 0.47               | 0.23              | 0.52 | <u>0.61</u> | <u>0.68</u> | 0.45               | 0.24              | 0.60 | <b>0.79</b> | <u>0.68</u> |
| Temporal_Pole_Mid  | 0.22               | 0.10              | 0.29 | 0.08        | 0.41        | 0.15               | 0.27              | 0.45 | 0.50        | <u>0.71</u> |
| Temporal_Inf       | 0.44               | 0.19              | 0.44 | 0.58        | <u>0.73</u> | 0.36               | 0.35              | 0.62 | <b>0.80</b> | <b>0.80</b> |

<sup>a</sup> broad heritability of these regions were not significantly larger than zero (lower bound of 95% CI < 0.005)

Underlined: Rg is significantly ( $p < 0.05$ ) different from zero

Bold: Rg is FDR corrected significantly different from zero



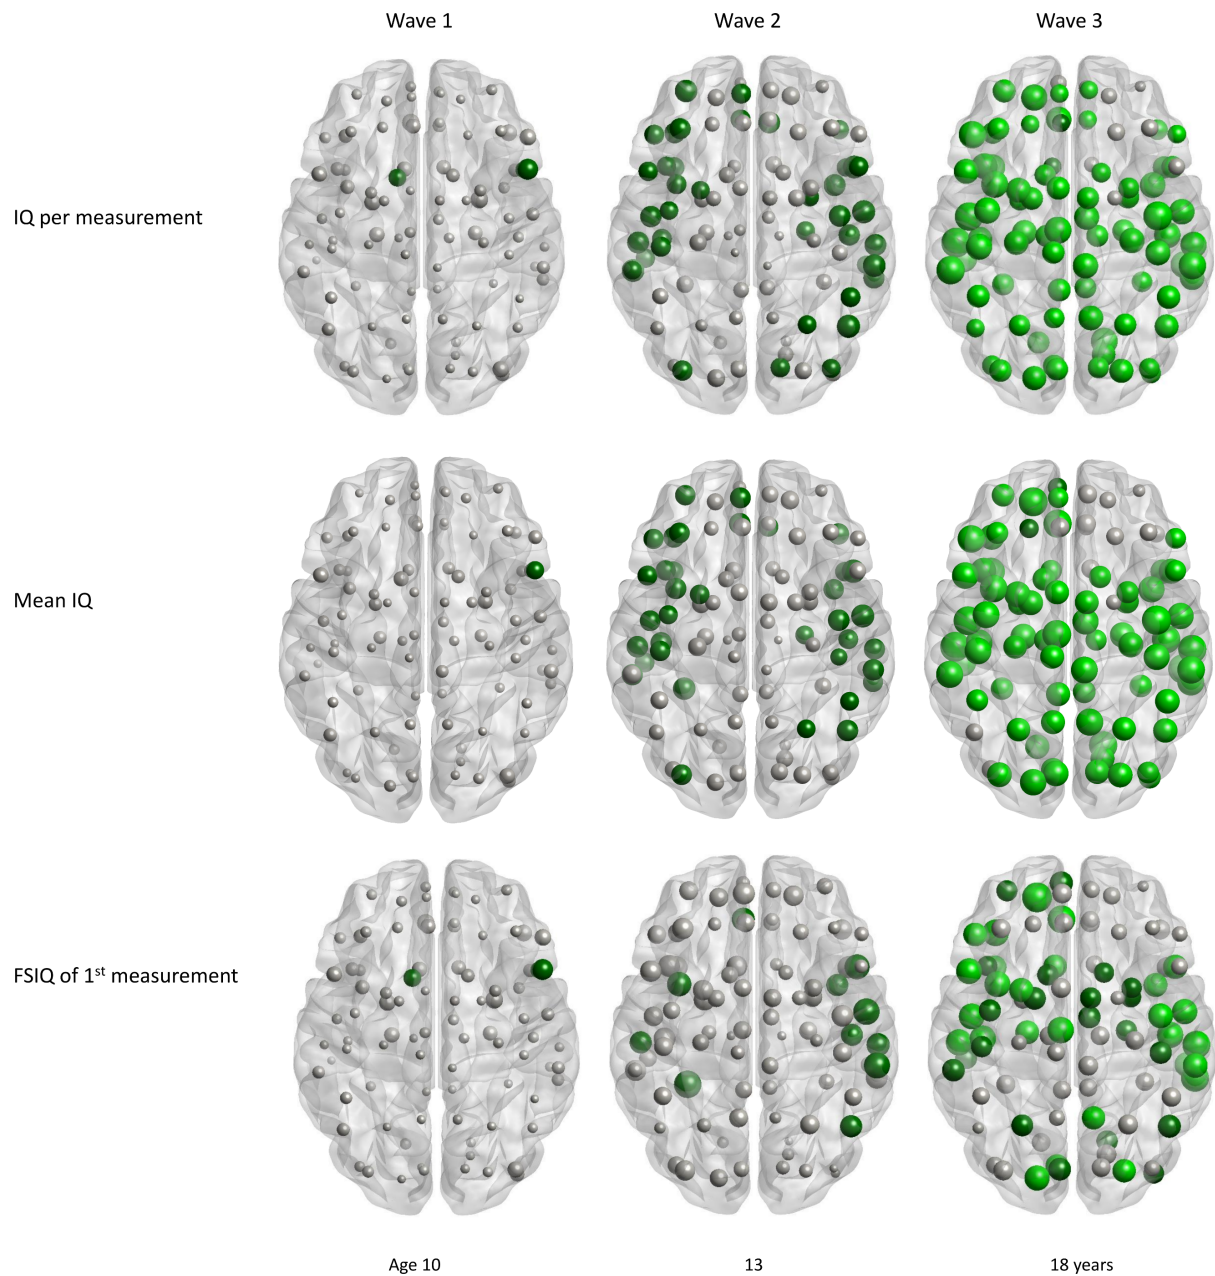

**Supplemental Figure S3** – Effect of choice of IQ measurement on the correlation between IQ and local efficiency. Presentation of the phenotypic correlations between local efficiency and IQ at wave 1, 2, and 3. Size of the sphere is the absolute correlation strength, dark green nodes indicate significance at  $p < 0.05$ ; light green nodes indicate FDR-corrected significance.
